# Supplementary material for: Exploration of novel non-purine xanthine oxidase inhibitors based on oxadiazolones by an integrated simulation study
Source: Royal Society of Chemistry journal article supplement (doi:10.1039/d4nj00094c), 2024-01-01
Supplement: d4nj00094c1.pdf [file d4nj00094c1.pdf]

*Supporting Information*

**Exploration of Novel Non-purine Xanthine Oxidase Inhibitors Based on Oxadiazolones by An Integrated Simulation Study**

Cheng Xie,<sup>a</sup> Na Zhai,<sup>a</sup> Xiaojiao Zheng,<sup>a</sup> Minghong Jiang,<sup>a</sup> Yilan Zhao,<sup>a</sup> Zhiqiang Xu,<sup>a</sup> Qi Sun,<sup>\*a</sup> and Genyan Liu,<sup>\*a</sup>

<sup>a</sup>*Key Laboratory for Green Chemical Process of Ministry of Education, Hubei Key Laboratory of Novel Reactor and Green Chemical Technology, School of Chemical Engineering and Pharmacy, Wuhan Institute of Technology, Wuhan 430205, P. R. China*

**\*Corresponding authors:** Genyan Liu, PhD & Professor; Qi Sun, PhD & Associate Professor

*E-mail addresses:* liugenyan@wit.edu.cn (G. Liu); qisun@wit.edu.cn (Q. Sun)

**Tab. S1.** Chemical structures of the used compounds and their actual and predicted pIC<sub>50</sub> values.

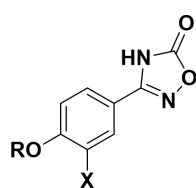

Compounds 01-21: 1H-tetrazol-1-yl  
Compounds 22: H

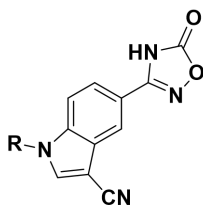

Compounds 23-43

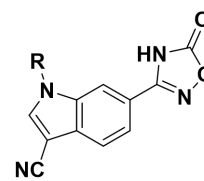

Compounds 44-47

| No.                | IC <sub>50</sub> (μM) | pIC <sub>50</sub> | R                                   | CoMFA                       |           | CoMSIA                      |           |
|--------------------|-----------------------|-------------------|-------------------------------------|-----------------------------|-----------|-----------------------------|-----------|
|                    |                       |                   |                                     | Predicted pIC <sub>50</sub> | Residuals | Predicted pIC <sub>50</sub> | Residuals |
| 01 <sup>a</sup>    | 3.212                 | 5.493             | methyl                              | 5.628                       | 0.135     | 5.436                       | 0.057     |
| 02                 | 0.345                 | 6.462             | <i>iso</i> -propyl                  | 6.477                       | 0.015     | 6.437                       | 0.025     |
| 03 <sup>a</sup>    | 0.514                 | 6.289             | <i>iso</i> -butyl                   | 6.283                       | 0.006     | 6.258                       | 0.031     |
| 04 <sup>b</sup>    | 0.173                 | 6.762             | <i>iso</i> -pentyl                  | 6.765                       | 0.003     | 6.705                       | 0.057     |
| 05                 | 0.232                 | 6.635             | <i>iso</i> -pentenyl                | 6.624                       | 0.011     | 6.658                       | 0.023     |
| 06 <sup>a</sup>    | 0.245                 | 6.611             | propinyl                            | 6.615                       | 0.004     | 6.594                       | 0.017     |
| 07                 | 0.303                 | 6.519             | methylene cyclopropane              | 6.501                       | 0.018     | 6.564                       | 0.045     |
| 08                 | 0.315                 | 6.502             | cyclopentyl                         | 6.506                       | 0.004     | 6.453                       | 0.049     |
| 09 <sup>b</sup>    | 0.121                 | 6.917             | methylene cyclohexane               | 6.909                       | 0.008     | 6.883                       | 0.034     |
| 10                 | 0.146                 | 6.836             | benzyl                              | 6.819                       | 0.017     | 6.758                       | 0.078     |
| 11                 | 0.208                 | 6.682             | <i>p</i> -methylbenzyl              | 6.686                       | 0.004     | 6.765                       | 0.083     |
| 12 <sup>a, b</sup> | 0.315                 | 6.502             | <i>p</i> - <i>tert</i> -butylbenzyl | 6.434                       | 0.068     | 6.616                       | 0.114     |
| 13                 | 0.160                 | 6.796             | <i>p</i> -methoxybenzyl             | 6.798                       | 0.002     | 6.833                       | 0.037     |
| 14                 | 0.151                 | 6.821             | <i>p</i> -fluorobenzyl              | 6.848                       | 0.027     | 6.794                       | 0.027     |
| 15 <sup>b</sup>    | 0.149                 | 6.827             | <i>p</i> -chlorobenzyl              | 6.770                       | 0.057     | 6.775                       | 0.052     |
| 16                 | 0.206                 | 6.686             | <i>p</i> -bromobenzyl               | 6.722                       | 0.036     | 6.774                       | 0.088     |
| 17 <sup>b</sup>    | 0.157                 | 6.804             | <i>m</i> -methylbenzyl              | 6.811                       | 0.007     | 6.797                       | 0.007     |
| 18 <sup>a</sup>    | 0.334                 | 6.476             | <i>m</i> -methoxybenzyl             | 6.493                       | 0.017     | 6.447                       | 0.029     |
| 19                 | 0.233                 | 6.633             | <i>m</i> -fluorobenzyl              | 6.651                       | 0.018     | 6.676                       | 0.043     |
| 20                 | 0.185                 | 6.733             | <i>m</i> -chlorobenzyl              | 6.695                       | 0.038     | 6.696                       | 0.037     |
| 21                 | 0.215                 | 6.668             | <i>m</i> -bromobenzyl               | 6.698                       | 0.030     | 6.695                       | 0.027     |

|                    |       |       |                            |       |       |       |       |
|--------------------|-------|-------|----------------------------|-------|-------|-------|-------|
| 22 <sup>a, b</sup> | 3.282 | 5.484 | methylene cyclohexane      | 5.571 | 0.087 | 5.406 | 0.078 |
| 23                 | 4.130 | 5.384 | H                          | 5.384 | 0.000 | 5.386 | 0.002 |
| 24 <sup>a</sup>    | 5.410 | 5.267 | methyl                     | 5.497 | 0.230 | 5.267 | 0.000 |
| 25 <sup>a, b</sup> | 0.41  | 6.387 | <i>iso</i> -propyl         | 5.987 | 0.400 | 5.919 | 0.468 |
| 26 <sup>b</sup>    | 1.09  | 5.963 | <i>iso</i> -butyl          | 5.968 | 0.005 | 5.959 | 0.004 |
| 27                 | 1.02  | 5.991 | <i>iso</i> -pentyl         | 5.995 | 0.004 | 5.990 | 0.001 |
| 28                 | 1.24  | 5.907 | 3-methylbut-2-en-1-yl      | 5.903 | 0.004 | 5.911 | 0.004 |
| 29 <sup>a</sup>    | 0.88  | 6.056 | methylene cyclopropane     | 5.985 | 0.071 | 5.984 | 0.072 |
| 30 <sup>a, b</sup> | 0.36  | 6.444 | cyclopentyl                | 6.191 | 0.253 | 6.093 | 0.351 |
| 31                 | 2.86  | 5.544 | methylene cyclohexane      | 5.543 | 0.001 | 5.544 | 0.000 |
| 32                 | 1.72  | 5.764 | benzyl                     | 5.724 | 0.040 | 5.728 | 0.036 |
| 33                 | 1.71  | 5.767 | <i>p</i> -fluorobenzyl     | 5.697 | 0.070 | 5.729 | 0.038 |
| 34                 | 2.40  | 5.620 | <i>p</i> -chlorobenzyl     | 5.708 | 0.088 | 5.671 | 0.051 |
| 35                 | 2.07  | 5.684 | <i>p</i> -bromobenzyl      | 5.711 | 0.027 | 5.636 | 0.048 |
| 36                 | 1.14  | 5.943 | <i>p</i> -methylbenzyl     | 5.947 | 0.004 | 5.931 | 0.012 |
| 37                 | 1.02  | 5.991 | <i>p</i> -methoxybenzyl    | 5.975 | 0.016 | 6.004 | 0.013 |
| 38                 | 1.44  | 5.842 | <i>p</i> -tert-butylbenzyl | 5.833 | 0.009 | 5.828 | 0.014 |
| 39                 | 3.60  | 5.444 | <i>m</i> -fluorobenzyl     | 5.451 | 0.007 | 5.546 | 0.102 |
| 40                 | 2.93  | 5.533 | <i>m</i> -chlorobenzyl     | 5.551 | 0.018 | 5.540 | 0.007 |
| 41                 | 2.60  | 5.585 | <i>m</i> -bromobenzyl      | 5.558 | 0.027 | 5.508 | 0.077 |
| 42 <sup>b</sup>    | 2.16  | 5.666 | <i>m</i> -methylbenzyl     | 5.675 | 0.009 | 5.744 | 0.078 |
| 43                 | 1.70  | 5.770 | <i>m</i> -methoxybenzyl    | 5.778 | 0.008 | 5.761 | 0.009 |
| 44                 | 1.80  | 5.745 | <i>iso</i> -propyl         | 5.756 | 0.011 | 5.756 | 0.011 |
| 45                 | 6.56  | 5.183 | <i>iso</i> -pentyl         | 5.166 | 0.017 | 5.162 | 0.021 |
| 46 <sup>a, b</sup> | 0.82  | 6.086 | cyclopentyl                | 6.013 | 0.073 | 5.943 | 0.143 |
| 47                 | 1.84  | 5.735 | <i>p</i> -methylbenzyl     | 5.741 | 0.006 | 5.749 | 0.014 |

<sup>a</sup> The test set compounds used for the 3D-QSAR models.

<sup>b</sup> The compounds used for constructing the pharmacophore models.

**Tab. S2.** Statistical results of the pharmacophore models constructed by GALAHAD.

| Name             | SPECIFICITY  | N_HITS    | FEATS    | PARETO   | ENERGY      | STERICS      | HBOND        | MOL_QRY      |
|------------------|--------------|-----------|----------|----------|-------------|--------------|--------------|--------------|
| MODEL_001        | 1.245        | 11        | 8        | 0        | 4.3         | 922.6        | 305.9        | 84.02        |
| MODEL_002        | 1.246        | 11        | 8        | 0        | 5.13        | 922.5        | 291.2        | 97.95        |
| MODEL_003        | 1.246        | 11        | 8        | 0        | 21.3        | 988.6        | 316.3        | 91.19        |
| MODEL_004        | 1.246        | 11        | 8        | 0        | 21.3        | 988.6        | 316.3        | 91.19        |
| MODEL_005        | 1.245        | 11        | 8        | 0        | 3.91        | 845.3        | 285.9        | 91.19        |
| MODEL_006        | 1.218        | 11        | 8        | 0        | 6.45        | 945.5        | 282.6        | 97.95        |
| MODEL_007        | 1.246        | 11        | 8        | 0        | 4.16        | 834.8        | 294.7        | 91.19        |
| MODEL_008        | 1.244        | 11        | 8        | 0        | 9.41        | 913.9        | 289.9        | 98.77        |
| MODEL_009        | 1.218        | 11        | 8        | 0        | 4.95        | 842          | 290.8        | 96.55        |
| MODEL_010        | 1.248        | 11        | 8        | 0        | 5.48        | 936          | 275.2        | 97.95        |
| MODEL_011        | 1.247        | 11        | 8        | 0        | 5.08        | 877.1        | 278.2        | 98.77        |
| MODEL_012        | 2.202        | 9         | 8        | 0        | 4.51        | 833          | 285.7        | 94.44        |
| <b>MODEL_013</b> | <b>4.499</b> | <b>10</b> | <b>8</b> | <b>0</b> | <b>4.15</b> | <b>882.1</b> | <b>288.4</b> | <b>54.17</b> |
| MODEL_014        | 1.245        | 11        | 8        | 0        | 4.77        | 857.9        | 280.2        | 91.19        |
| MODEL_015        | 1.244        | 11        | 8        | 0        | 5.04        | 833.1        | 277.9        | 97.95        |
| MODEL_016        | 2.202        | 11        | 8        | 0        | 4.31        | 767.2        | 280.4        | 94.44        |
| MODEL_017        | 3.216        | 8         | 9        | 0        | 4.99        | 869.6        | 277.2        | 88.15        |
| MODEL_018        | 2.203        | 11        | 8        | 0        | 3.9         | 718.6        | 262.8        | 96.55        |
| MODEL_019        | 1.219        | 11        | 8        | 0        | 3.44        | 676.1        | 249.2        | 93.3         |
| MODEL_020        | 3.489        | 9         | 8        | 0        | 4.59        | 691          | 275          | 95.08        |

**Tab. S3.** The ADMET prediction results of the virtual-screened hits (S01-S05).

| Molecule                | S01                        | S02    | S03    | S04    | S05    |         |
|-------------------------|----------------------------|--------|--------|--------|--------|---------|
| pkCSM                   | Water solubility (log S)   | -2.688 | -3.016 | -3.102 | -3.364 | -5.47   |
|                         | Intestinal absorption (%)  | 76.787 | 85.867 | 79.638 | 78.417 | 93.816  |
|                         | Skin permeability (log Kp) | -2.744 | -2.728 | -2.738 | -2.735 | -2.684  |
|                         | P-gp substrate             | Yes    | No     | No     | No     | Yes     |
|                         | P-gp I inhibitor           | No     | No     | Yes    | Yes    | Yes     |
|                         | P-gp II inhibitor          | No     | No     | No     | Yes    | Yes     |
|                         | BBB permeability (log BB)  | -1.758 | -1.107 | -1.216 | -1.747 | -0.415  |
|                         | CNS permeability (log PS)  | -3.747 | -3.062 | -3.342 | -3.983 | -1.712  |
|                         | CYP2D6 substrate           | No     | No     | No     | No     | No      |
|                         | CYP3A4 substrate           | No     | Yes    | Yes    | Yes    | Yes     |
|                         | CYP1A2 inhibitor           | No     | Yes    | No     | Yes    | Yes     |
|                         | CYP2C19 inhibitor          | No     | No     | Yes    | No     | Yes     |
|                         | CYP2C9 inhibitor           | No     | No     | No     | No     | Yes     |
|                         | CYP2D6 inhibitor           | No     | No     | No     | No     | No      |
|                         | CYP3A4 inhibitor           | No     | No     | No     | Yes    | No      |
|                         | AMES toxicity              | No     | No     | No     | No     | No      |
| SwissADME               | MW (g/mol)                 | 333.32 | 330.29 | 373.36 | 396.33 | 350.374 |
|                         | Fraction Csp3              | 0.33   | 0.19   | 0.28   | 0.11   | 0.20    |
|                         | RotaTab. bonds             | 8      | 7      | 9      | 7      | 4       |
|                         | H-bond acceptors           | 8      | 7      | 7      | 9      | 5       |
|                         | H-bond donors              | 1      | 0      | 1      | 0      | 0       |
|                         | TPSA (Å <sup>2</sup> )     | 98.69  | 96.70  | 108.73 | 117.93 | 84.48   |
|                         | GI absorption              | High   | High   | High   | High   | High    |
|                         | BBB permeant               | No     | No     | No     | No     | No      |
|                         | P-gp substrate             | Yes    | No     | No     | No     | No      |
|                         | CYP1A2 inhibitor           | No     | Yes    | No     | Yes    | Yes     |
|                         | CYP2C19 inhibitor          | No     | Yes    | Yes    | Yes    | Yes     |
|                         | CYP2C9 inhibitor           | No     | Yes    | Yes    | No     | Yes     |
|                         | CYP2D6 inhibitor           | No     | No     | No     | No     | No      |
|                         | CYP3A4 inhibitor           | No     | No     | Yes    | Yes    | No      |
| Lipinski #violations    | 0                          | 0      | 0      | 0      | 0      |         |
| Synthetic accessibility | 3.32                       | 3.23   | 3.44   | 3.42   | 3.82   |         |

gp: P-glycoprotein; BBB: blood-brain barrier; CNS: central nervous system; CYP: cytochrome P450; MW: molecular weight; TPSA: topological polar surface area; GI: gastrointestinal.

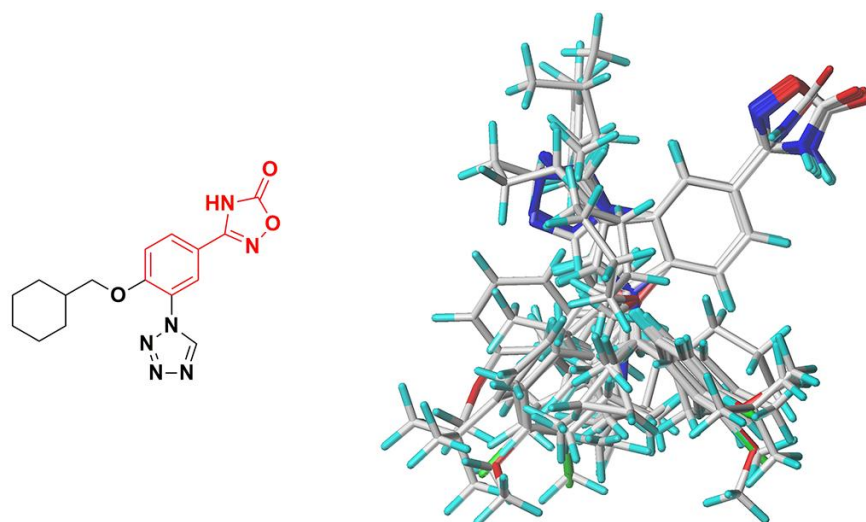

**Fig. S1.** The molecular alignment for the 3D-QSAR models using compound **09** as a template.

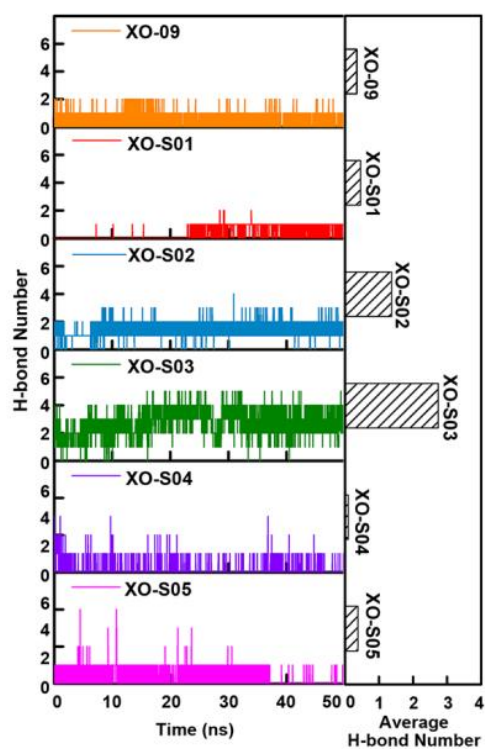

**Fig. S2.** The H-bond numbers and their average values of complexes XO-09 (orange), XO-S01 (red), XO-S02 (blue), XO-S03 (olive), XO-S04 (violet), and XO-S05 (magenta) during the 50 ns MD simulations.
